# Supplementary material for: Regional Variety of Reduction in Retinal Thickness of Diabetic Macular Edema after Anti-VEGF Treatment
Source: Medicina (Kaunas). 2022 Jul 14;58(7):933. doi: 10.3390/medicina58070933 (PMC9321650; doi:10.3390/medicina58070933)
Supplement: Supplementary file 1 [file medicina-58-00933-s001.zip › medicina-1763737-supplementary.pdf]

**Table S1. Baseline characteristics at the time of registration**

|                                | All patients<br>(n=46) |
|--------------------------------|------------------------|
| Age (year)                     | 65.76 ± 12.18          |
| Male gender                    | 35/46 (76.1%)          |
| History of vitrectomy          | 4/46 (8.7%)            |
| History of cataract surgery    | 20/46 (43.5%)          |
| History of PRP                 | 26/46 (56.5%)          |
| Creatinine (mg/dl)             | 0.92 ± 0.32            |
| Hemoglobin A1c (%)             | 7.60 ± 1.35            |
| Duration of DM (years)         | 13.11 ± 12.07          |
| Aflibercept used for treatment | 42/46 (91.3%)          |

PRP; pan retinal photocoagulation

DM; diabetes mellitus
